# Supplementary material
Source: PubMed Central journal article supplement (PMC7849003)
Supplement: AAC.01275-20-s0001.pdf [file AAC.01275-20-s0001.pdf]

## SUPPLEMENTAL FIGURE

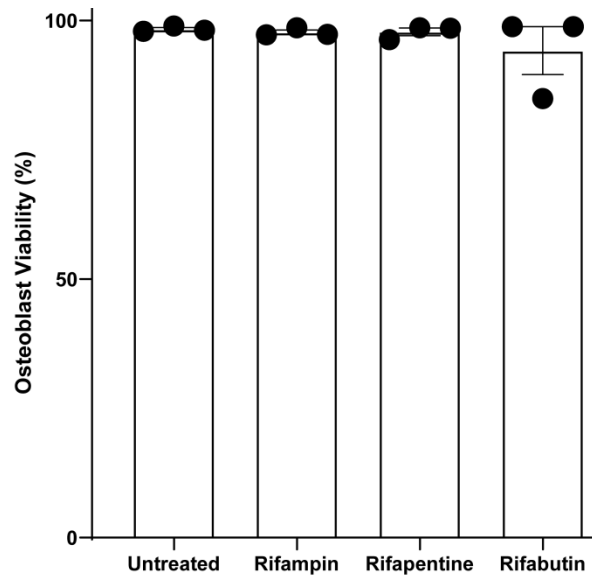

**FIGURE S1. MC-3T3-E1 viability after 24 hour rifamycin treatment.** Viability of MC-3T3-E1 osteoblasts left untreated for 24 hours, or treated with 16  $\mu\text{g/ml}$  rifampin, rifapentine, or rifabutin for 24 hours. Cells were harvested, stained with Ghost Red 780 Viability Dye, and analyzed via flow cytometry. Data depicted as the mean + standard error of the mean for  $n=3$  flow cytometry experiments.
